# Supplementary material for: Direct application of cobaltite-based perovskite cathodes on the yttria-stabilized zirconia electrolyte for intermediate temperature solid oxide fuel cells
Source: Royal Society of Chemistry journal article supplement (doi:10.1039/c6ta07067a), 2016-01-01
Supplement: c6ta07067a1.pdf [file c6ta07067a1.pdf]

## Electronic Supplementary Information

### **Direct application of cobaltite-based perovskite cathodes on yttria-stabilized zirconia electrolyte for intermediate temperature solid oxide fuel cells**

Kongfa Chen,<sup>‡ab</sup> Na Li,<sup>‡bc</sup> Na Ai,<sup>b</sup> Meng Li,<sup>d</sup> Yi Cheng,<sup>b</sup> William D.A. Rickard,<sup>e</sup> Jian Li<sup>d</sup> and San Ping Jiang<sup>\*b</sup>

<sup>a</sup> *College of Materials Science and Engineering, Fuzhou University, Fuzhou, Fujian 350108, China*

<sup>b</sup> *Fuels and Energy Technology Institute & Department of Chemical Engineering, Curtin University, Perth, WA 6102, Australia. \*Email: S.Jiang@curtin.edu.au; Fax: +61 8 9266 1138; Tel: +61 8 9266 9804*

<sup>c</sup> *College of Science, Heilongjiang University of Science and Technology, Harbin 150022, China*

<sup>d</sup> *State Key Laboratory for Coal Combustion, School of Materials Science and Engineering, Huazhong University of Science and Technology, Wuhan 430074, China*

<sup>e</sup> *John De Laeter Centre & Department of Physics and Astronomy, Curtin University, Perth, WA 6102, Australia*

<sup>‡</sup>These authors contributed equally.

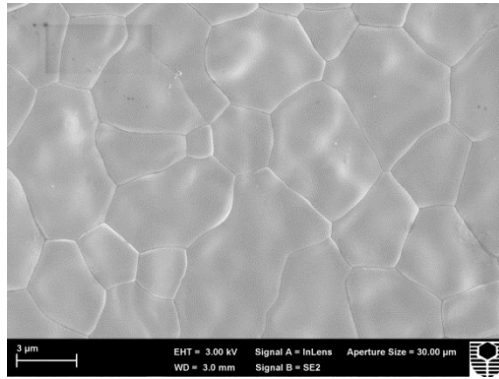

**Figure S1.** Typical SEM image of surface of a sintered YSZ electrolyte film.

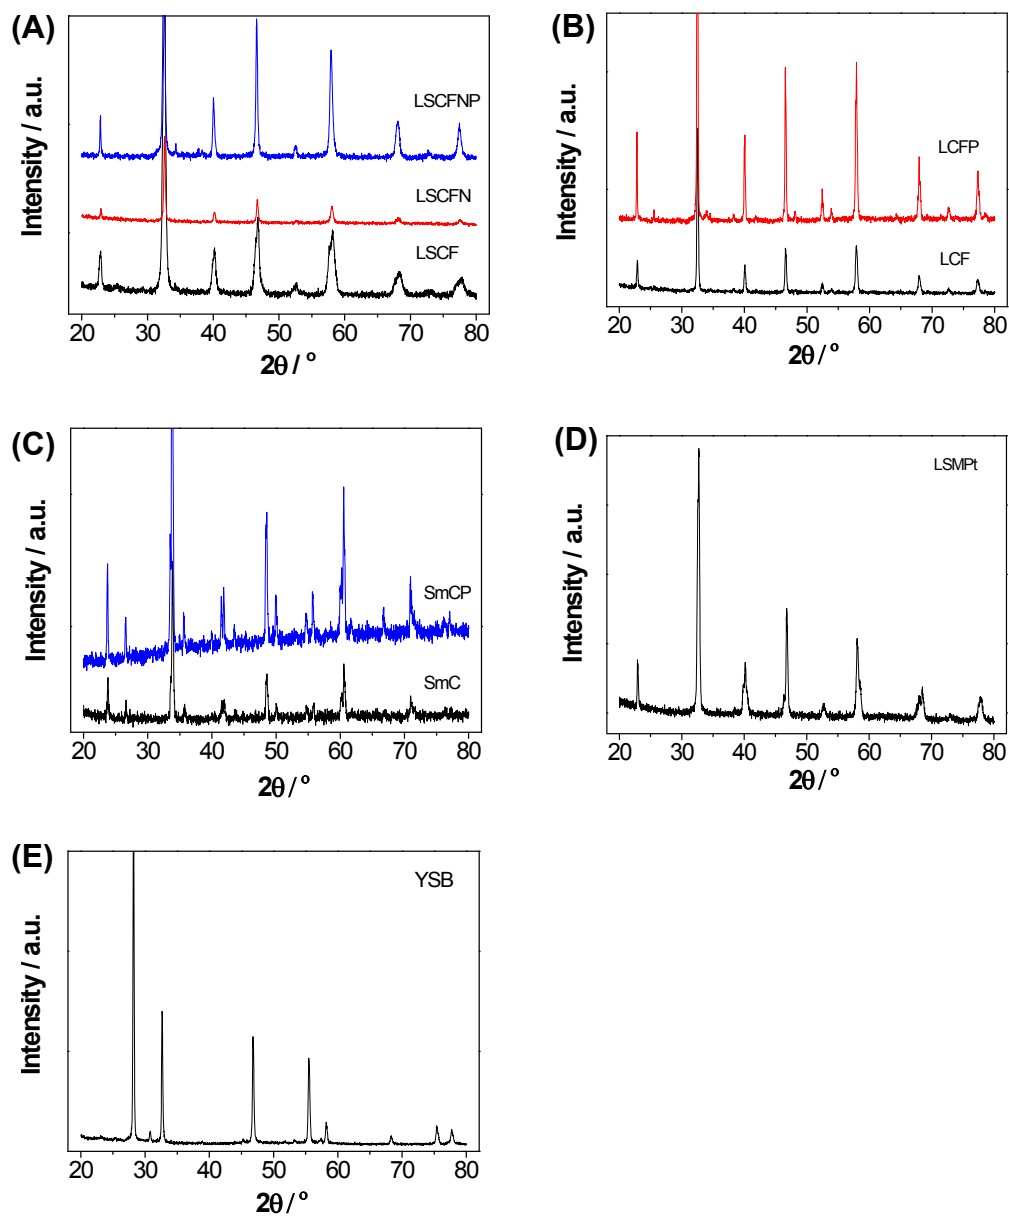

**Figure S2.** XRD patterns of as-prepared cathode and electrolyte powders: (A) LSCF, LSCFN and LSCFNP, (B) LCF and LCFP, (C) SmC and SmCP, (D) LSMPt, and (E) YSB.

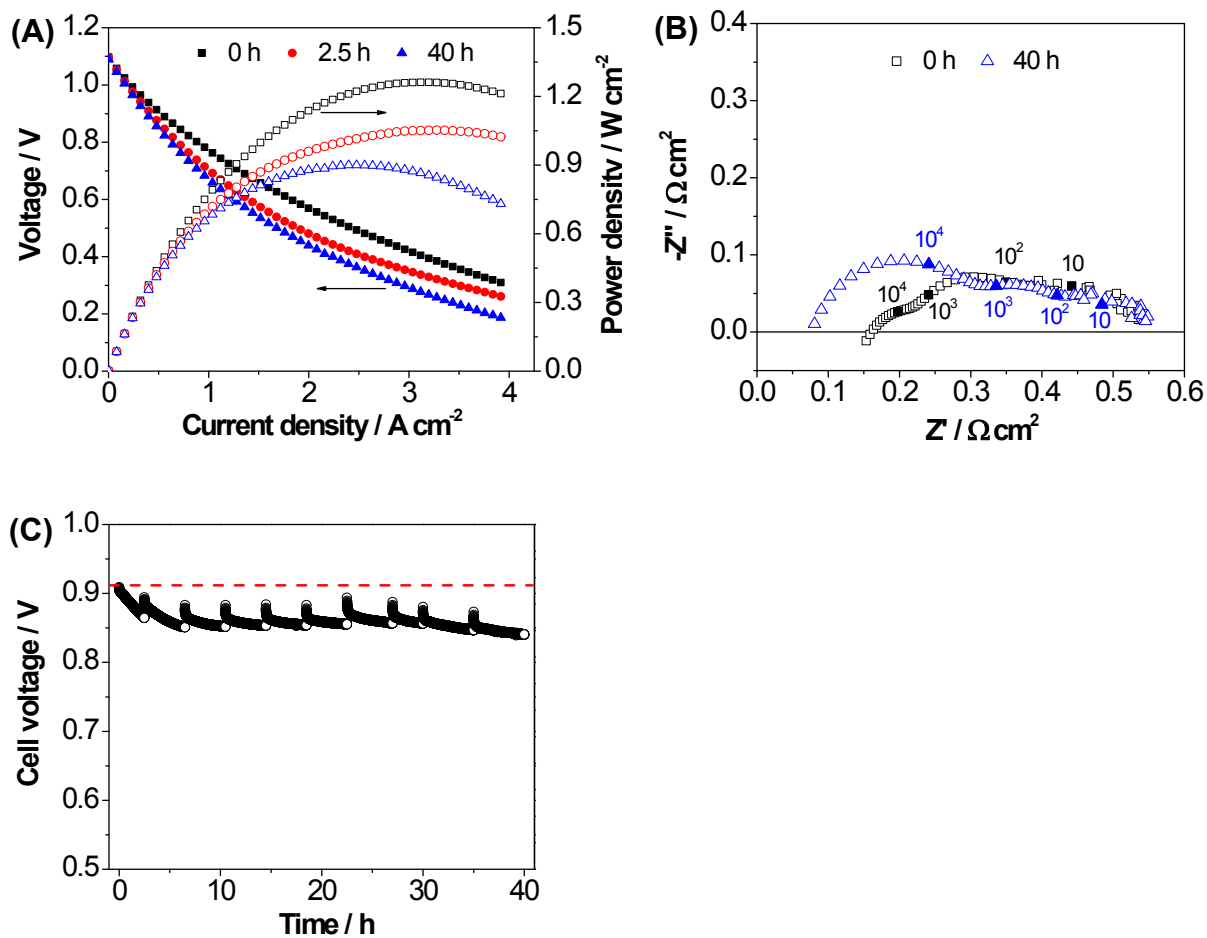

**Figure S3.** Polarization performance of a cell with the *in situ* assembled LSCF-GDC (6:4, w/w) composite cathode as a function of polarization time at 750 °C and 500 mA cm<sup>-2</sup>: (A) polarization curves, (B) impedance curves and the numbers are frequency in Hz, and (C) stability curve.

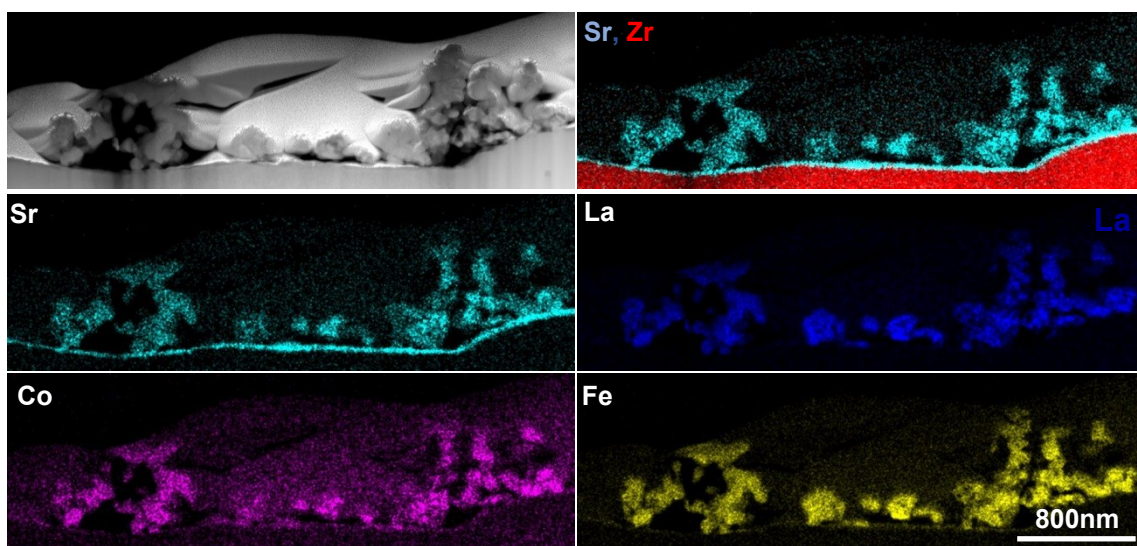

**Figure S4.** STEM image and elemental maps at the electrode/electrolyte interface of the *in situ* assembled LSCF electrode after the polarization at  $500 \text{ mA cm}^{-2}$ ,  $750 \text{ }^\circ\text{C}$  for 100 h.

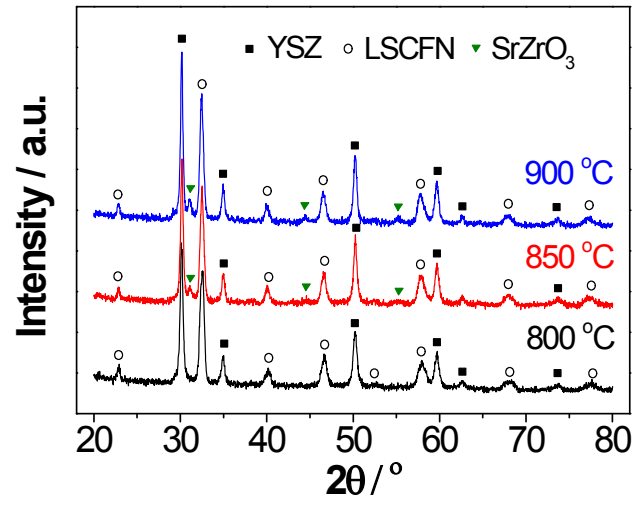

**Figure S5.** XRD patterns of LSCFN-YSZ couple powder heat-treated at 800-900 °C.

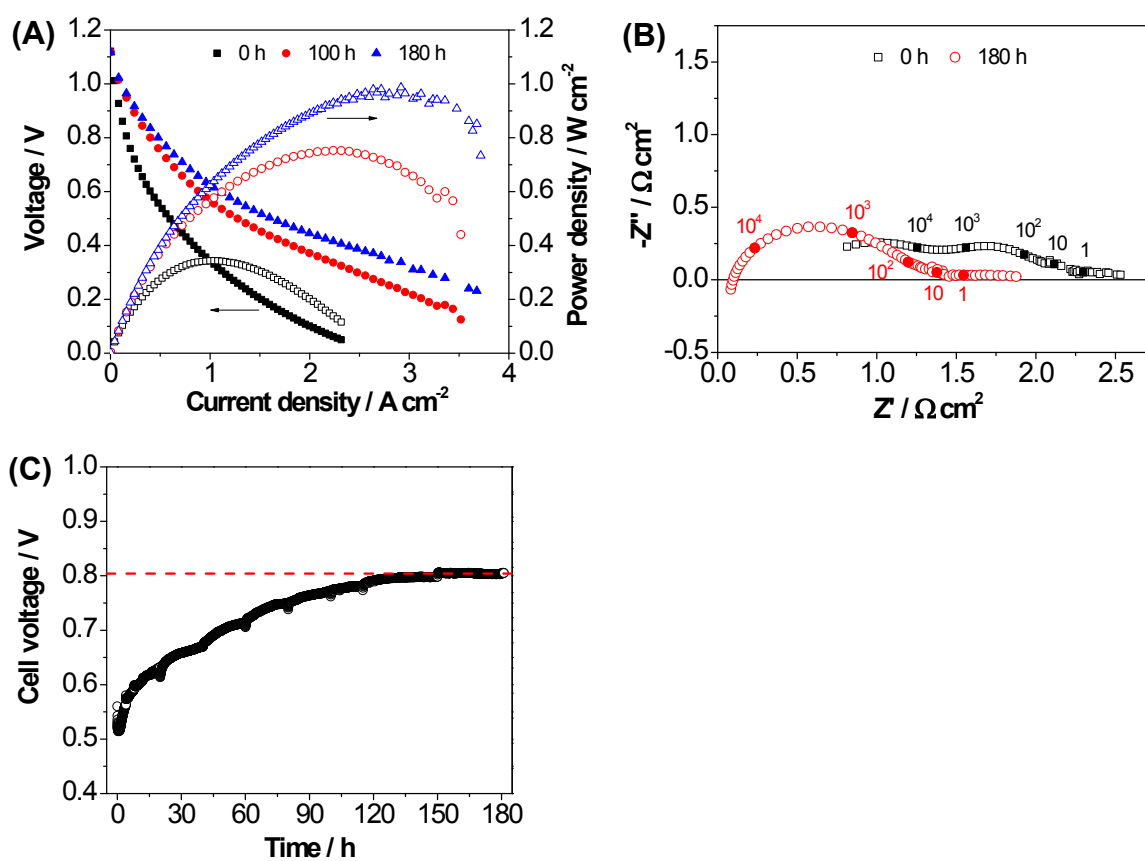

**Figure S6.** Polarization performance of an anode-supported YSZ film with an *in situ* assembled LSCFN electrodes as a function of polarization time at 500 mA cm<sup>-2</sup>, 750 °C: (A) polarization curves, (B) impedance curves and the numbers are frequency in Hz, and (C) stability curve.
